# Supplementary material
Source: PubMed Central journal article supplement (PMC6391663)
Supplement: ba029199-suppl1.pdf [file ba029199-suppl1.pdf]

**Table S1.** Chemotherapy regimens that were utilized for Burkitt lymphoma in Lilongwe, Malawi from 2013 to 2018.

| <u>Regimen</u>                 | <u>Drug</u>      | <u>Dose</u>                      | <u>Timing (Day)</u> |
|--------------------------------|------------------|----------------------------------|---------------------|
| CHOP (adult) <sup>14</sup>     | Cyclophosphamide | 750 mg/m <sup>2</sup>            | 1                   |
|                                | Doxorubicin      | 50 mg/m <sup>2</sup>             | 1                   |
|                                | Vincristine      | 1.4 mg/m <sup>2</sup> (max 2 mg) | 1                   |
|                                | Prednisone       | 60 mg/m <sup>2</sup> /day        | 1-5                 |
| CHOP (pediatric) <sup>17</sup> | Cyclophosphamide | 850 mg/m <sup>2</sup>            | 1                   |
|                                | Doxorubicin      | 50 mg/m <sup>2</sup>             | 1                   |
|                                | Vincristine      | 1.5 mg/m <sup>2</sup> (max 2 mg) | 1                   |
|                                | Prednisone       | 1.5 mg/kg/day                    | 1-5                 |
| DA-EPOCH*                      | Etoposide        | 50 mg/m <sup>2</sup> /day        | 1-4                 |
|                                | Prednisone       | 60 mg/m <sup>2</sup> /day        | 1-5                 |
|                                | Vincristine      | 0.4 mg/m <sup>2</sup> /day       | 1-4                 |
|                                | Doxorubicin      | 10 mg/m <sup>2</sup> /day        | 1-4                 |
|                                | Cyclophosphamide | 750 mg/m <sup>2</sup>            | 1                   |
| COP                            | Cyclophosphamide | 300 mg/m <sup>2</sup>            | 1                   |
|                                | Vincristine      | 1.5 mg/m <sup>2</sup>            | 1                   |
|                                | Prednisone       | 60 mg/m <sup>2</sup> /day        | 1-7                 |
| COPADM                         | Cyclophosphamide | 1500 mg/m <sup>2</sup>           | 1                   |
|                                | Vincristine      | 1.5 mg/m <sup>2</sup>            | 1                   |
|                                | Prednisone       | 60 mg/m <sup>2</sup> /day        | 1-5                 |
|                                | Doxorubicin      | 60 mg/m <sup>2</sup>             | 1                   |
|                                | Methotrexate     | 1 g/m <sup>2</sup>               | 1                   |
| CYM                            | Cytarabine       | 100 mg/m <sup>2</sup> /day       | 2-6                 |
|                                | Methotrexate     | 1 g/m <sup>2</sup>               | 1                   |
| R-CHOP                         | Rituximab        | 375 mg/m <sup>2</sup>            | 1                   |
|                                | Cyclophosphamide | 750 mg/m <sup>2</sup>            | 1                   |
|                                | Doxorubicin      | 50 mg/m <sup>2</sup>             | 1                   |
|                                | Vincristine      | 1.4 mg/m <sup>2</sup> (max 2 mg) | 1                   |
|                                | Prednisone       | 60 mg/m <sup>2</sup> /day        | 1-5                 |
| EPIC <sup>19</sup>             | Etoposide        | 100 mg/m <sup>2</sup> /day       | 1-4                 |
|                                | Prednisone       | 60 mg/m <sup>2</sup> /day        | 1-5                 |
|                                | Ifosfamide       | 1000 mg/m <sup>2</sup> /day      | 1-4                 |
|                                | Mesna            | 600 mg/m <sup>2</sup> /day       | 1-4                 |
|                                | Cisplatin        | 75 mg/m <sup>2</sup>             | 15                  |
| ICE                            | Ifosfamide       | 2000 mg/m <sup>2</sup> /day      | 1-3                 |
|                                | Mesna            | 2000 mg/m <sup>2</sup> /day      | 1-3                 |
|                                | Carboplatin      | 560 mg/m <sup>2</sup>            | 1                   |
|                                | Etoposide        | 100 mg/m <sup>2</sup> /day       | 1-3                 |

\* DA-EPOCH infusions over 8 hours each day.
